# Supplementary material for: Natural polymorphisms in HIV-1 CRF01_AE strain and profile of acquired drug resistance mutations in a long-term combination treatment cohort in northeastern China
Source: Springer Nature journal article supplement (doi:10.1186/s12879-020-4808-3), 2020-02-26
Supplement: MOESM1 [file 17744844]

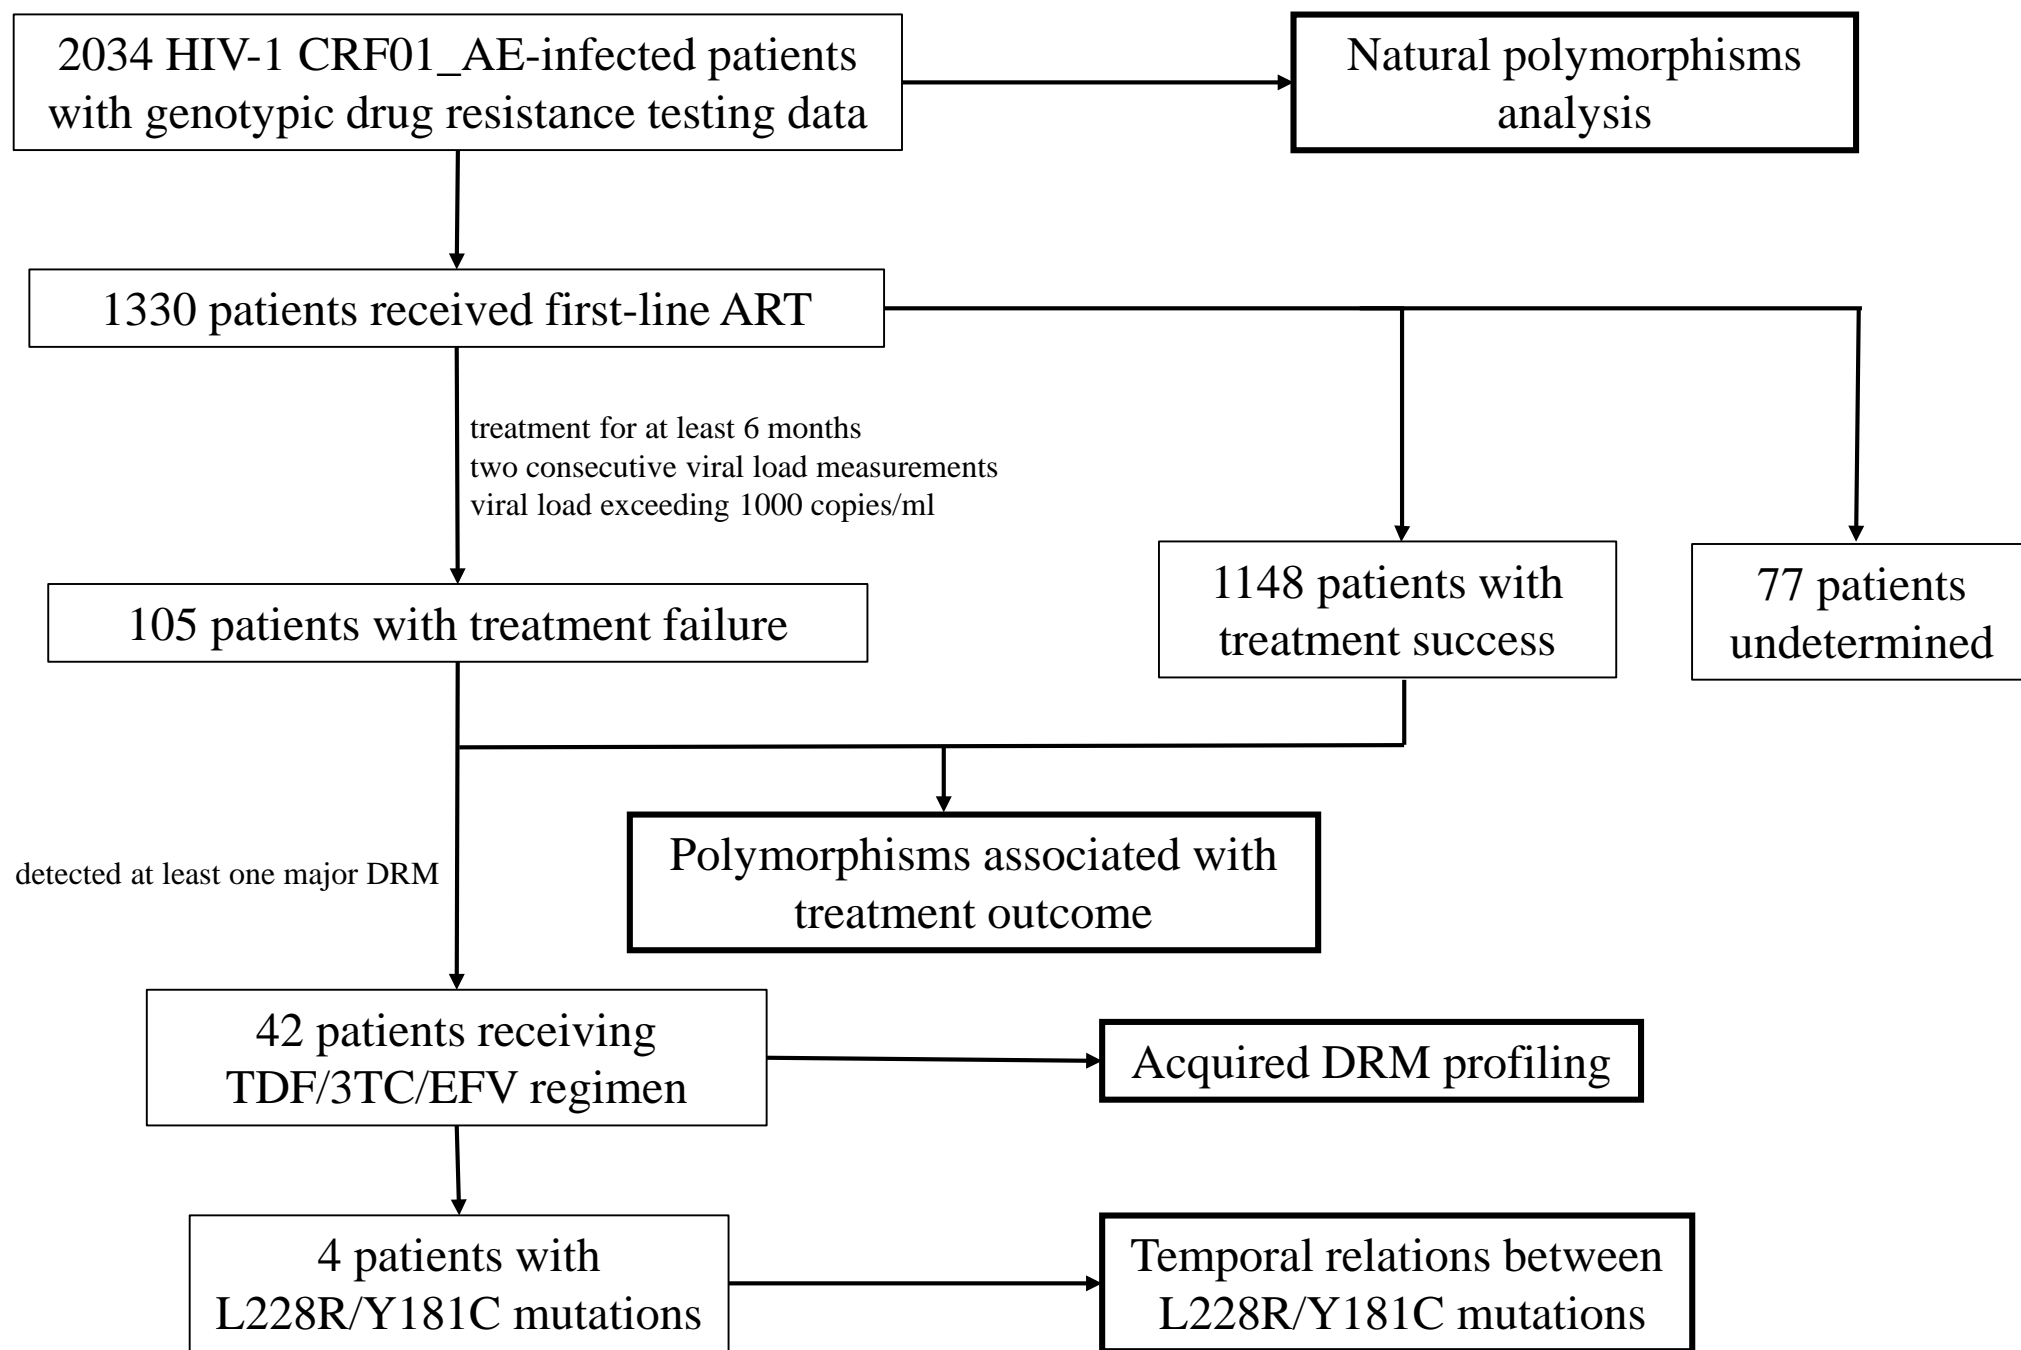

**Figure S1. Flow chart of selection and analysis**
