# Supplementary material for: Natural polymorphisms in HIV-1 CRF01_AE strain and profile of acquired drug resistance mutations in a long-term combination treatment cohort in northeastern China
Source: Springer Nature journal article supplement (doi:10.1186/s12879-020-4808-3), 2020-02-26
Supplement: MOESM2 [file 17744844]

**Table S1. Demographic and clinical characteristics of the 2034 CRF01\_AE infected cases**

| Characteristics              | total     | %    | Characteristics                                        | total       | %    |
|------------------------------|-----------|------|--------------------------------------------------------|-------------|------|
| <b>Gender</b>                |           |      | <b>Marital status</b>                                  |             |      |
| male                         | 1920      | 94.4 | single/divorced/widowhood                              | 1448        | 71.2 |
| female                       | 101       | 5.0  | married                                                | 566         | 27.8 |
| NA                           | 13        | 0.6  | NA                                                     | 20          | 1.0  |
| <b>Age(years)</b>            |           |      | <b>Degree of education</b>                             |             |      |
| Mean±SD                      | 40.7±13.1 |      | bachelor degree and above                              | 463         | 22.8 |
| >50                          | 487       | 23.9 | junior college                                         | 403         | 19.8 |
| 30-50                        | 1107      | 54.4 | high school or technical secondary school              | 440         | 21.6 |
| 20-30                        | 422       | 20.7 | primary or junior high school                          | 582         | 28.6 |
| <20                          | 7         | 0.3  | illiterate                                             | 3           | 0.1  |
| NA                           | 11        | 0.5  | NA                                                     | 143         | 7.0  |
| <b>Route of transmission</b> |           |      | <b>Baseline viral load (log<sub>10</sub>copies/ml)</b> |             |      |
| homosexual                   | 1699      | 83.5 | Mean±SD                                                | 5.2±5.8     |      |
| heterosexual                 | 255       | 12.5 | >5                                                     | 593         | 29.2 |
| IDU                          | 21        | 1.0  | 4-5                                                    | 1106        | 54.4 |
| others                       | 2         | 0.1  | 3-4                                                    | 244         | 12.0 |
| NA                           | 57        | 2.8  | <3                                                     | 17          | 0.8  |
|                              |           |      | NA                                                     | 74          | 3.6  |
| <b>Ethnicity</b>             |           |      | <b>Baseline CD4+ count (cells/μl)</b>                  |             |      |
| Han                          | 1739      | 85.5 | Mean±SD                                                | 260.0±171.3 |      |
| Man                          | 199       | 9.8  | >500                                                   | 151         | 7.4  |
| minorities                   | 77        | 3.8  | 200-500                                                | 1083        | 53.2 |
| NA                           | 19        | 0.9  | <200                                                   | 735         | 36.1 |
|                              |           |      | NA                                                     | 65          | 3.2  |

**Note:** NA means not available. SD: Standard Deviation. IDU: Intravenous Drug Use.

**Table S2. Demographic and clinical characteristics of the 42 CRF01\_AE infected cases**

| Characteristics       | total    | %    | Characteristics                                   | total      | %    |
|-----------------------|----------|------|---------------------------------------------------|------------|------|
| Gender                |          |      | Marital status                                    |            |      |
| male                  | 40       | 95.2 | single/divorced                                   | 24         | 57.1 |
| female                | 0        | 0    | married                                           | 13         | 31.0 |
| NA                    | 2        | 4.8  | NA                                                | 5          | 11.9 |
| Age(years)            |          |      | Degree of education                               |            |      |
| Mean±SD               | 38.1±9.5 |      | bachelor degree and above                         | 5          | 11.9 |
| >50                   | 8        | 19.0 | junior college                                    | 12         | 28.6 |
| 30-50                 | 25       | 59.5 | high school or technical secondary school         | 7          | 16.7 |
| <30                   | 7        | 16.7 | primary or junior high school                     | 9          | 21.4 |
| NA                    | 2        | 4.8  | NA                                                | 9          | 21.4 |
| Route of transmission |          |      | Baseline viral load (log <sub>10</sub> copies/ml) |            |      |
| homosexual            | 27       | 64.3 | Mean±SD                                           | 5.6±5.7    |      |
| heterosexual          | 6        | 14.3 | >5                                                | 28         | 66.7 |
| IDU                   | 0        | 0    | 4-5                                               | 14         | 33.3 |
| others                | 1        | 2.4  | <4                                                | 0          | 0    |
| NA                    | 8        | 19.0 |                                                   |            |      |
| Ethnicity             |          |      | Baseline CD4+ count (cells/μl)                    |            |      |
|                       |          |      | Mean±SD                                           | 74.1±101.3 |      |
| Han                   | 33       | 78.6 | >200                                              | 3          | 7.1  |
| Man                   | 3        | 7.1  | 100-200                                           | 7          | 16.7 |
| minorities            | 1        | 2.4  | 50-100                                            | 8          | 19.0 |
| NA                    | 5        | 11.9 | <50                                               | 24         | 57.1 |

**Note:** NA means not available. SD: Standard Deviation. IDU: Intravenous Drug Use.
