# Supplementary material for: Natural polymorphisms in HIV-1 CRF01_AE strain and profile of acquired drug resistance mutations in a long-term combination treatment cohort in northeastern China
Source: Springer Nature journal article supplement (doi:10.1186/s12879-020-4808-3), 2020-02-26
Supplement: MOESM4 [file 17744844]

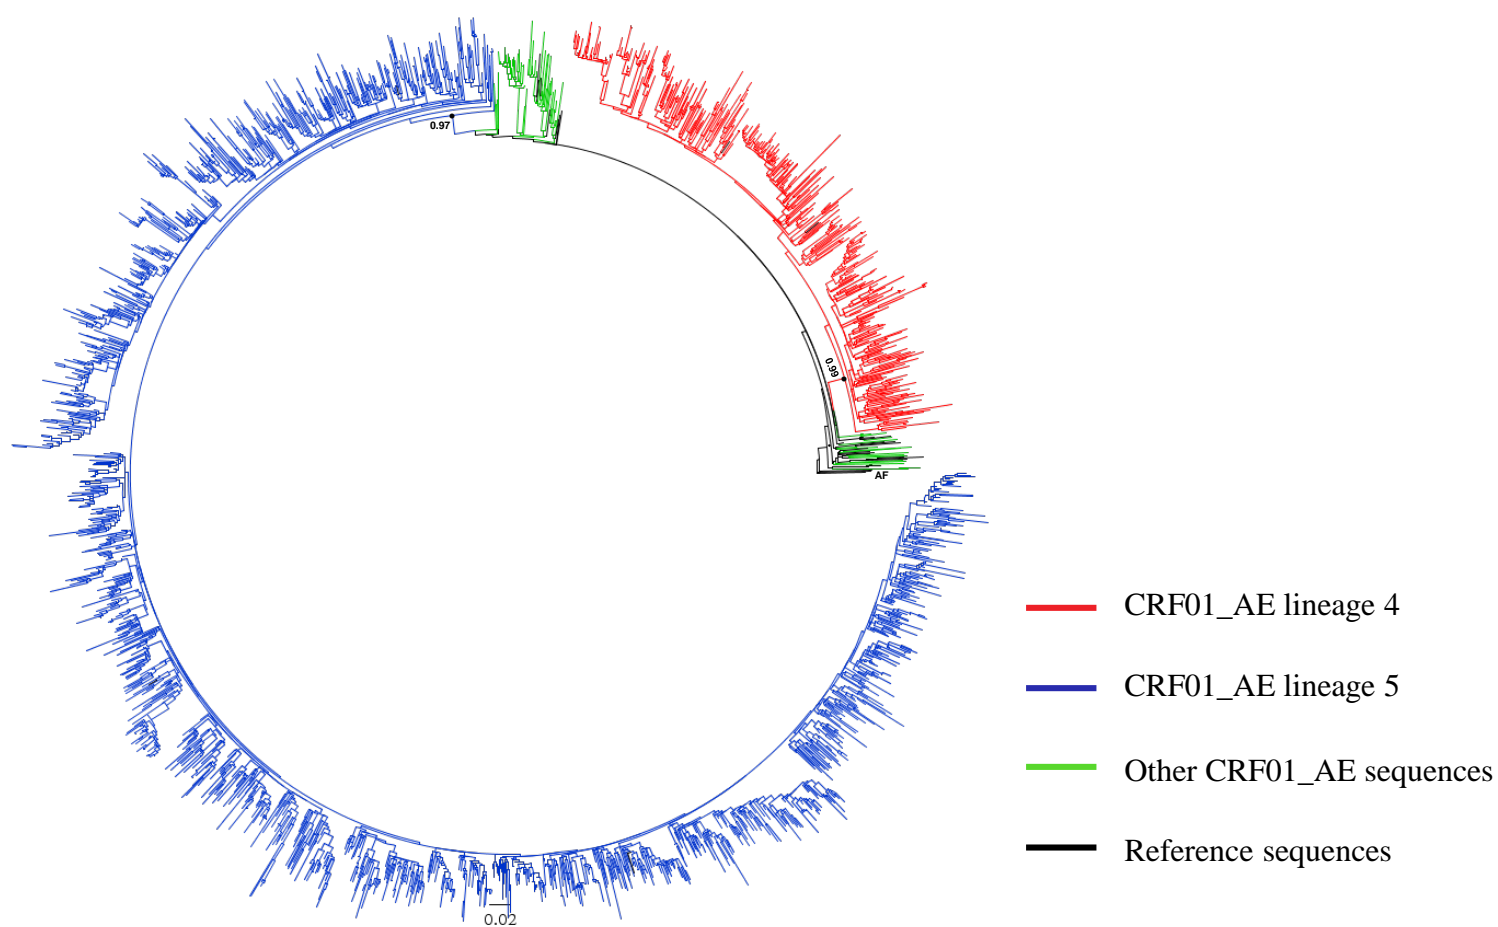

**Figure S2. Phylogenetic analysis of the CRF01\_AE HIV-1 pol sequences.**

The *pol* sequences of 2034 CRF01\_AE-infected patients at baseline were analyzed by the maximum-likelihood method in FastTree v2.1.9. The nucleotide substitution model was GTR+G+I. Local support values were computed by the Shimodaira-Hasegawa test (SH test) with 1000 replicates. Node SH-like support value  $\geq 0.9$  was identified as a lineage and was indicated at relevant nodes. Three African CRF01\_AE reference sequences were at the root of the ML tree. The various lineages were color-coded.
